# Supplementary material for: Methanolysis of nitrile-functionalised pendant arm derivatives of 1,4,7-triazacyclononane upon coordination to CuIIElectronic supplementary information (ESI) available: frozen solution EPR (77 K) spectra for [Cu(1)](BF4)2 and [Cu(2)](BF4)2·H2O (Fig. S1) and [Cu(L2)Cl2] (Fig. S2) in CH3CN–DMF (9 ∶ 1) solutions. Modelling of the disorder in [Cu(1)](BF4)2 and [Cu(2)](BF4)2·H2O. See http://www.rsc.org/suppdata/dt/b2/b209091k/
Source: Royal Society of Chemistry journal article supplement (doi:10.1039/b209091k), 2003-01-07
Supplement: b209091k.doc [file b209091k.doc]

# Supplementary information

(a)

Figure S1 Frozen solution EPR (77 K) spectra for (a) [Cu(1)](BF4)2 and (b) [Cu(2)](BF4)2 in CH3CN/DMF (9:1) solutions.

Figure S2 Frozen solution EPR (77 K) spectrum for [Cu(L2)Cl2] in CH3CN/DMF (9:1) solutions.

**Modelling of the disorder in [Cu(1)](BF4)2 and [Cu(2)](BF4)2·H2O**

In [Cu(**1**)](BF4)2 the carbon atoms on the macrocyclic backbone and one BF4 anion were found disordered and were modelled using partial occupancy models over two sites (occupancy factors 0.616/0.384 for the carbon atoms and 0.398/0.602 for the BF4¯).

### In [Cu(**2**)](BF4)2·H2O there are four cations in the asymmetric unit, with 8 anions and four H2O molecules. Two of the cations are free of disorder. One of the disordered cations shows disorder in the nitrile pendant arm, modelled over two sites 65:35 occupancies. The hydrogen atoms on C(17A) are also disordered The highest residual peak in the difference Fourier is in this region. In the other disordered cation one of the two methoxy group is disordered and was modelled over two sites, 75:25 occupancies. Only one of the eight BF4¯ shows disorder, although some show large thermal motions. The 8th had three of the four fluorine modelled over three sites 50:30:20 with restraints applied. Even so it is poorly behaved and an apparent H2O molecule is very close to some of the F sites. Same restraints were applied to the other BF4¯ anions. There are four H2O in the asymmetric unit, two are modelled as fully occupied, the other two are modelled as two sites 80:20 occupancies.
